# Supplementary material for: Preparation of novel polythioether dendrons on a solid supportElectronic supplementary information (ESI) available: procedures for the preparation of monomer 3, resins G1–G4, 4–8, and relevant characterisation data. See http://www.rsc.org/suppdata/cc/b3/b302324a/
Source: Royal Society of Chemistry journal article supplement (doi:10.1039/b302324a), 2003-04-22
Supplement: b302324a.doc [file b302324a.doc]

Preparation of Novel Polythioether Dendrons on Solid Support

Adi Dahan, Avi Weissberg and Moshe Portnoy*

*Supplementary Information for the deposition with the ESI service*

This supplementary information includes: procedures for the preparation of monomer **3**, resins **G1-G4**, **4-8** and the relevant characterisation data.

# Experimental Section

**General.** All reactions were conducted under a nitrogen atmosphere in oven-dried glassware with magnetic stirring. Dimethyl 5-hydroxyisophthalate, LiBH4 (a 2.0 M solution in THF), B(OMe)3, PPh3, DMAP, TFA, dimethylthiocarbamoyl chloride, DABCO, NaOMe (0.5M in Methanol), hexachloroethane and 4-(diphenylphosphino)benzoic acid were purchased from Sigma-Aldrich at the highest available purity and used as received. Analytically pure DIC was purchased from Acros Organics and used as received. The synthesis was performed on Wang Bromo resin (0.72 mmol/g, 1% DVB, 100-200 mesh) purchased from Novabiochem.

Pd(dba)2 and Pd(PhCN)2Cl2 were prepared according to known procedures.[[1]](#footnote-2)

THF was dried over, and distilled from, sodium/benzophenone ketyl. CH2Cl2 was dried over, and distilled from, CaH2. Anhydrous DMF and DMA were purchased from Sigma-Aldrich.

Solution 1H (200 MHz) and 13C NMR (50 MHz and 100 MHz) spectra were recorded on Bruker AC-200 and AVANCE-400 spectrometers in CDCl3/TFA 1:1 with residual solvent peaks (1H: 7.26 ppm, 13C: 77.16 ppm) as references. Gel-phase 13C NMR spectra were recorded in benzene-*d*6 or dioxane-*d*8, using a Bruker AVANCE-400 instrument. MS and MALDI-TOF were recorded on a Micromass VG- Autospec M250 and Voyager DE-STR MALDI-TOF.

Yields were determined using the 1H NMR of TFA:CHCl3 (1:1) cleavage solutions with C6H6 (7.36 ppm) as an internal standard. Alcohols were partially converted to TFA esters under these conditions.

Synthesis of dimethyl 5-(dimethylthiocarbamoyloxy)isophthalate

Dimethyl 5–hydroxyisophthalate (4 g, 0.019 mol, 1 equiv), DABCO (4.26 g, 0.038 mol, 2 equiv) and dimethylthiocarbamoyl chloride (3.45 g, 0.0285 mol, 1.5 equiv) were dissolved in dry DMA (30 ml). The resulting cloudy solution was stirred for 0.5 h at 30 0C and then heated over 0.5 h to 75 0C. After cooling, 60 ml of water was added and the mixture was filtered. The solid was washed with 60 ml of water and dried under vacuum. The recrystallization from ethanol-benzene (4:1) yielded 4.82 g (85%) of a yellow crystalline solid.

1H NMR (200 MHz, CDCl3): 8.58 (s, 1H, **H2**), 7.93 (s, 2H, **H1**), 3.94 (s, 6H, **H3**), 3.46 (s, 3H, **H4**), 3.37 (s, 3H, **H5**).

13C (50 MHz, CDCl3): 186.8 **C7**, **C5**, 153.7 **C1**, 131.4 **C3**, 128.2 **C2**, 127.9 **C4**, 52.3 **C6**, 43.2 **C8**, 38.6 **C9**.

IR: 3026, 2992, 2954, 1726, 1540, 1458, 1435, 1400,1331, 1280,1254, 1215, 1188.8, 1168, 1130, 1009.

HRMS: calcd. 297.0671, found 297.0672.

mp: 101 0C

Synthesis of dimethyl 5-(dimethylcarbamoylthio)isophthalate

Dimethyl 5-(dimethylthiocarbamoyloxy)isophthalate was heated to 280 0C for 10 min. The crude material was chromatographed on a silica gel column (5:1 Hexanes/EtOAc) to give 4.56 g (95%) of the pure product as an off-white crystalline solid.

1H NMR (200 MHz, CDCl3):  8.66 (s, 1H, **H2**), 8.31 (s, 2H, **H1**), 3.90 (s, 6H, **H3**), 3.04 (br s, 6H, **H4**).

13C (50 MHz, CDCl3): 165.4 **C5** + **C7**, 140.6 **C2**, 131.1 **C3** + **C4**, 130.4 **C1**, 52.4 **C6**, 36.9 **C8**.

I.R: 3027, 3012, 2954, 1727, 1670, 1441, 1370, 1316, 1252, 1146, 1101, 908.

HRMS: calcd. 297.0671, found 297.0671.

mp: 109 0C.

Typical procedure for the nucleophilic substitution step. Synthesis of **G1(CO2Me)**

Dimethyl 5-(dimethylcarbamoylthio)isophthalate (0.64 g, 2.2 mmol, 3 equiv) was dissolved in 3.4 ml of a 0.5M methanolic solution of NaOMe (1.73 mmol, 2.4 equiv). The solution was heated to 60 0C overnight. After cooling, DMF (20 ml) and Wang Bromo resin (1 g, 0.72 mmol/g, 0.72 mol, 1 equiv) were added to the mixture. The suspension was mixed at 80 0C for 8 h. The resin was washed with DMF, DMF/water, water, THF and DCM and then dried under vacuum.

Yield>99%, purity>99 %, loading 0.65 mmol/g.

Gel-phase 13C NMR (100 MHz, C6D6): 164.8 **C5**, 158.4 **C9**, 145.5 **C10**, 138.8 **C1**, 133.0 **C2**, 131.0 **C3**, 114.5 **C8**, 69.4 Meriffield linker, 51.3 **C6**, 36.9 **C7**.

1H NMR (200 MHz, CDCl3/TFA 1:1):  8.46 (s, 1H, **H2**), 8.19 (s, 2H, **H1)**, 7.28 (d, J = 4.2 Hz, 2H, **H5**), 6.88 (d, J = 4.2 Hz, 2H, **H6**), 4.22 (s, 2H, **H4**), 4.06 (s, 6H, **H3**).

13C NMR (100 MHz, CDCl3/TFA 1:1): 168.6 **C5**, 152.3 **C9**, 138.8 **C1**, 134.8 **C2**, 134.3 **C11**, 132.6 **C10**, 130.0 **C4**, 129.9 **C3**, 115.2 **C8**, 52.9 **C6**, 37.1 **C7**.

HRMS calcd. 226.0300, found 226.0301.

Typical procedure for the reduction step. Synthesis of **G1(OH)**

LiBH4 (6.5 ml, 13.0 mmol, 20 equiv, 2M in THF) and B(OMe)3 (0.073 ml, 0.65 mmol, 1 equiv) were added to a suspension of the resin **G1(CO2Me)** (1.0 g, 0.65 mmol, 0.65 mmol/g, 1.3 groups of ester) in dry THF (10 ml). The mixture was refluxed overnight. The resin was washed with water, a solution of ammonium chloride/THF (1:1), a solution of 10% HCl/THF (1:1), water, THF and DCM and then dried under vacuum.

Yield 82%, purity >99%, loading 0.51 mmol/g.

Gel-phase 13C NMR (100 MHz, dioxane *d*8): 159.7 **C8**, 142.6 **C3**, 136.5 **C1**, 129.4 **C9**, 124.7 **C2**, 121.9 **C4**, 114.1 **C7**, 69.1 Meriffield linker, 63.3 **C5**, 36.7 **C6**.

1H NMR (200 MHz, CDCl3/TFA 1:1):  7.15-7.30 (m, 3H, **H1** + **H2**), 7.28 (d, J = 4.2 Hz, 2H, **H5**), 6.88 (d, J = 4.2 Hz, 2H, **H6**), 5.35 (s, 4H-xH, **H3b**),4.81 (s, xH, **H3a**),4.22 (S, 2H, **H4**).

13C NMR (100 MHz, CDCl3/TFA 1:1):  138.3 **C1**, 134.8 **C3**, 130.6 **C2**, 125.8 **C4**, 69.4 **C5**, 38.1 **C6**.

HRMS: calcd. 362.0048, found: 362.0049.

## Typical procedure for the chlorodehydroxylation step. Synthesis of **G1(Cl)**

Hexachloroethane (1.3 g, 5.6 mmol, 11 equiv) and triphenylphosphine (1.5 g, 5.6 mmol, 11 equiv) were added to a suspension of the resin **G1(OH)** (1.0 g, 0.51 mmol, 0.51 mmol/g, 1.02 mmol groups of OH) in dry THF (10 ml). The suspension was mixed at r.t. overnight. The resin was washed with THF, chloroform and DCM and dried under vacuum.

Yield 85%, purity >99%, loading 0.42 mmol/g.

Gel-phase 13C NMR (100 MHz, C6D6): 138.2 **C1** + **C3**, 129.8 **C4**, 128.4 **C2**, 114.6 **C7**, 69.5 Meriffield linker, 37.4 **C6**, 44.8 **C5**.

1H NMR (200 MHz, CDCl3/TFA 1:1): 7.31 (m, 3H, **H1** + **H2**), 7.28 (d, J = 4.2 Hz, 2H, **H5**), 6.88 (d, J = 4.2 Hz, 2H, **H6**), 4.51 (s, 4H, **H3**), 4.22 (s, 2H, **H4**).

HRMS: calcd. 413.9278, found: 413.9291.

**G2(CO2Me).** Yield>99%, purity>99 %, loading 0.36 mmol/g.

Partial gel-phase 13C NMR (100 MHz, C6D6): 164.8 **C10**, 137.7 **C6** + **C1**, 133.1 **C7** + **C2**, 131.0 **C8** + **C3**, 114.5 **C13**, 69.2 Meriffield linker, 51.5 **C11**, 37.0 **C5** + **C12**.

1H NMR (200 MHz, CDCl3/TFA 1:1): 8.46 (s, 2H, **H5**), 8.14 (s, 4H, **H4**), 7.28 (d, J = 4.2 Hz, 2H, **H8**), 7.18 (s, 3H, **H1** + **H2**), 6.88 (d, J = 4.2 Hz, 2H, **H9**), 4.22 (s, 2H, **H7**), 4.03 (s, 16H, **H3** + **H6**).

13C NMR (100 MHz, CDCl3/TFA 1:1): 168.3 **C10**, 138.6 **C3**, 137.3 **C6**, 134.6 **C7**, 129.9 **C9**, 129.3 **C8**, 128.3 **C2**, 127.6 **C4**, 53.1 **C11**, 37.6 **C12**, 37.3 **C5**.

HRMS: calcd. 586.0790, found 586.0778.

**G2(OH).** Yield>85%, purity>99 %, loading 0.32 mmol/g.

Partial gel-phase 13C NMR (100 MHz, dioxane *d*8): 142.7 **C8**, 138.3 **C3**, 135.8 **C6** + **C1**, 129.5 **C14**, 127.1 **C2**, 125.3 **C7**, 122.1 **C9**, 114.1 **C12**, 69.1 Meriffield linker, 63.2 **C10**, 37.0 **C11** + **C5**.

1H NMR (200 MHz, CDCl3/TFA 1:1): 7.28 (d, J = 4.2 Hz, 2H, **H8**), 7.10-7.35 (m, 9H, **H1** + **H2** + **H4** + **H5**), 6.88 (d, J = 4.2 Hz, 2H, **H9**), 5.32 (s, 8H-xH, **H6b**),4.81 (s, xH, **H6a**),4.22 (s, 2H, **H7**), 4.04 (s, 4H, **H3**).

13C NMR (100 MHz, CDCl3/TFA 1:1): 152.5 **C15**, 138.0 **C6**, 137.4 **C3**, 134.4 **C8**, 129.5 **C7**, 128.6 **C2**, 127.2 **C4**, 126.0 **C9**, 115.2 **C14**, 68.6 **C10**, 37.8 **C5**, 37.5 **C11**.

HRMS: calcd. 858.0285, found 858.0289.

**G2(Cl).** Yield = 95%, purity > 99%, loading 0.30 mmol/g.

Partial gel-phase 13C NMR (100 MHz, C6D6): 138.3 **C8** + **C6** + **C3** + **C1**, 128.6 **C7**, 114.6 **C12**, 44.8 **C10**, 37.5 **C11** + **C5**.

1H NMR (200 MHz, CDCl3/TFA 1:1): 7.28 (d, J = 4.2 Hz, 2H, **H8**), 7.10-7.26 (m, 9H, **H1**, **H2**, **H4**, **H5**), 6.88 (d, J = 4.2 Hz, 2H, **H9**), 4.51 (s, 8H, **H6**), 4.22 (s, 2H, **H7**), 4.02 (s, 4H, **H3**).

**G3(CO2Me).** Yield>99%, purity> 99%, loading 0.25 mmol/g.

Partial gel-phase 13C NMR (100 MHz, C6D6): 164.3 **C15**, 137.2 **C11** + **C6 +** **C1**, 132.4 **C12** + **C2** + **C7**, 130.4 **C13** + **C8** + **C3**, 114.3 **C18**, 51.1 **C16**, 36.5 **C17** + **C5** + **C10**.

1H NMR (200 MHz, CDCl3/TFA 1:1): 8.46 (s, 4H, **H8**), 8.14 (s, 8H, **H7**), 7.28 (d, J = 4.2 Hz, 2H, **H11**), 7.08-7.34 (m, 9H, **H1** + **H2** + **H4** + **H5**), 6.88 (d, J = 4.2 Hz, 2H, **H12**), 4.22 (s, 6H, **H3** + **H10**), 4.02 (s, 32H, **H6** + **H9**).

13C NMR (100 MHz, CDCl3/TFA 1:1): 168.2 **C15**, 137.2 **C11**, 134.2 **C12**, 130.0 **C14**, 129.1 **C13**, 128.2 **C7**, 127.4 **C9**, 53.2 **C16**, 37.7 **C5**, 37.4 **C10**.

MALDI-TOF: calcd. for C71H64NaO17S7 (M + Na + linker) 1435.2, found 1435.3.

**G3(OH).** Yield>84%, purity> 99%, loading 0.22 mmol/g.

Partial gel-phase 13C NMR (100 MHz, dioxane *d*8): 142.6 **C13**, 138.4 **C8** + **C3**, 136.0 **C11** + **C6** + **C1,** 127.4 **C7** + **C2**, 125.3 **C12**, 122.3 **C14**, 114.6 **C17**, 63.2 **C15**, 37.0 **C16** + **C5** + **C10**.

1H NMR (200 MHz, CDCl3/TFA 1:1): 7.28 (d, J = 4.2 Hz, 2H, **H11**), 7.10-7.34 (m, 21H, **H1** + **H2** + **H4** +**H5** + **H7** + **H8)**, 6.88 (d, J = 4.2 Hz, 2H, **H12**), 5.35 (s, 16H-xH, **H9b**), 4.81 (s, xH, **H9a**), 4.22 (s, 2H, **H10**), 4.03 (s, 12H, **H3** + **H6**).

13C NMR (100 MHz, CDCl3/TFA 1:1): 138.1 **C11**, 137.5 **C8**, 134.5 **C13**, 129.3 **C12**, 128.2 **C7**, 127.6 **C9**, 125.9 **C14**, 68.5 **C15**, 38.3 **C5**, 37.7 **C10**.

MALDI TOF: Calcd. for C72H50F24LiO16S7 (M + Li) 1857.1, found 1857.7.

**G3(Cl).** Yield = 90%, purity>99 %, loading 0.19 mmol/g.

Partial gel-phase 13C NMR (100 MHz, C6D6): 138.3 **C13** + **C11** + **C8** + **C6** + **C3** + **C1**, 45.0 **C15**, 37.5 **C16** + **C5** + **C10**.

1H NMR (200 MHz, CDCl3/TFA 1:1): 7.28 (d, J = 4.2 Hz, 2H, **H11**), 6.81-7.35 (m, 21H, **H1** + **H2** + **H4** + **H5** + **H7** + **H8**), 6.88 (d, J = 4.2 Hz, 2H, **H12**), 4.53 (s, 16H, **H9**), 4.22 (s, 2H, **H10**), 4.03 (s, 12H, **H3** + **H6**).

**G4(CO2Me).** Yield>99%, purity> 99%, loading 0.15 mmol/g.

Partial gel-phase 13C NMR (100 MHz, C6D6): 165.0 **C20**, 138.2 **C16**, 137.8 **C11**, 133.1 **C17**, 131.2 **C19**, 51.8 **C21**, 37.3 **C15**.

1H NMR (200 MHz, CDCl3/TFA 1:1): 8.45 (s, 8H, **H11**), 8.13 (s, 16H, **H10**), 7.28 (d, J = 4.2 Hz, 2H, **H14**), 7.15-7.28 (m, 21H, **H1** + **H2** + **H4** + **H5** + **H7** + **H8**), 6.88 (d, J = 4.2 Hz, 2H, **H15**), 4.14 (s, 14H, **H13** + **H3** + **H6**), 4.02 (s, 6H, **H9** + **H12**).

13C NMR (100 MHz, CDCl3/TFA 1:1): 168.2 **C20**, 152.4 **C26**, 139.0 **C13**, 137.3 **C16**, 136.7 **C24**, 134.3 **C17**, 130.2 **C19**, 128.8 **C18**, 128.4 **C12**, 127.6 **C14**, 115.3 **C25**, 53.4 **C21**, 38.0 **C5** + **C10** + **C22**, 37.6 **C25**.

Synthesis of 4-(diphenylphosphino)benzoyl-capped **G3**(**4**)

Diisopropylcarbodiimide (0.67 ml, 4.4 mmol, 20 equiv) was added to a solution of 4-(diphenylphosphino)benzoic acid (2.8 g, 8.8 mmol, 40 equiv) in DCM (20 ml/g), cooled to 0 0C and the mixture was stirred for 20 min. The solvent was evaporated, and the residue redissolved in DMF (20 ml/g) and added to the resin **G3(OH)** (1 g, 0.51 mmol/g, 0.51 mmol). Dimethylaminopyridine (0.1 g, 0.88 mmol, 4 equiv) was added and the suspension was stirred overnight at ambient temperature. The resin was filtered, washed extensively with DMF, THF, and DCM and dried in vacuum.

Yield>99%, purity>99 %, loading 0.14 mmol/g.

Partial gel-phase 13C NMR (100 MHz, C6D6): 165.5 **C16**, 144.4 **C20**, 137.5 **C11** + **C13**, 136.5 **C21**, 134.0 **C22**, 133.3 **C19**, 132.0 **C12**, 129.5 **C14**, 128.6 **C2** + **C7** + **C17** + **C18** + **C23** + **C24**, 125.9 **C4** + **C9**, 115.5 **C27**, 65.9 **C15**, 37.8 **C25** + **C5** + **C1**.

Gel-phase 31P NMR (400 MHz, C6D6): 

1H NMR (200 MHz, CDCl3/TFA 1:1):  8.36 (dd, J = 2.4 Hz, J = 6.0 Hz, 16H, **H10**), 7.94 – 7.63 (m, 96H, **H11** + **H12** + **H13** + **H14**), 7.46 (S, 12H, **H7** + **H8**), 7.29 – 7.10 (m, 13H, **H1** + H2 + H4 + H5 + H16 + H17), 5.49 (S, 16H, **H9**), 4.05 (m, 14H, **H6** + **H9** + **H15**).

Complexation of the 4-diphenylphosphinobenzoyl-capped **G3** with Pd(dba)2 (**5**)

Pd(dba)2 (0.23 g, 0.39 mmol, 2.8 equiv) in dry THF (10 ml) was added to the suspension of the phosphinated resin **4** (1 g, 0.14 mmol/g, 0.14 mmol) in dry THF (10 ml). The suspension was mixed at r.t. for 4 h in a glove box. The resin was washed with THF and ether and dried under vacuum.

Yield>99%, purity>99 %, loading 0.47 mmol/g.

Gel phase 31P NMR (400 MHz, C6D6): 30.0 ppm.

Typical procedure for the preparation of polymer-bound ligand **7**

The solution of 11-bromoundecan-1-ol (2 eq) in DCM was added dropwise to a suspension of Wang Imidate resin in cyclohexane. The mixture was stirred at room temperature for 5 minutes. Then, a catalytic amount of boron trifluoride etherate was added, and the suspension was stirred at room temperature for another 10 minutes. The resin was filtered and washed with DCM, THF and DCM. The resin was dried under vacuum and then suspended in anhydrous DMF. In another flask, LiH (8 equiv) was added to the solution containing dimethyl 5-hydroxyisophthalate (10 equiv) in dry DMF. After 5 minutes of stirring, the solution was cannulated to the resin suspension, a catalytic ammout of tetrabutylammonium iodide was added and the reaction mixture stirred for 36 h at 60 0C. The resin was filtered, washed with DMF, DMF:water, water, THF and DCM, dried under vacuum, and then suspended in anhydrous THF. A solution of LiBH4 in anhydrous THF (2M, 20 equiv) and B(OMe)3 (1 equiv) were added dropwise and the reaction mixture refluxed overnight. The resin was washed with water, a solution of ammonium chloride/THF (1:1), a solution of 10% HCl/THF (1:1), water, THF and DCM, dried under vacuum, and then suspended in anhydrous THF. Hexachloroethane (11 equiv) and triphenylphosphine (11 equiv) were added to the suspension. The reaction mixture was stirred at r.t. overnight. The resin was washed with THF, chloroform and DCM, dried under vacuum, and then suspended in anhydrous DMF. CsCO3 (10 equiv) and thiophenol (20 equiv) were added and the reaction mixture was heated to 70 0C overnight. The resin was washed with DMF, DMF/water, THF and DCM and dried under vacuum.

Partial gel-phase 13C NMR (100 MHz, C6D6):  159.2, 138.6, 136.4, 113.4, 71.9, 69.4, 67.1, 38.1, 29.2, 25.7.

1H NMR (200 MHz, CDCl3/TFA 1:1):  7.23-7.33 (m, 10H), 6.90 (s, 1H), 6.76 (s, 2H), 4.42 (t, J = 6.6 Hz, 2H), 4.01 (s, 4H), 3.98 (t, J = 2.3 Hz, 2H), 1.80 (m, 4H), 1.34 (m, 14H).

Typical procedure for the complexation of resin-bound SCS ligand precursors. Complexation of **G2(CO2Me)** with Pd(PhCN)2Cl2 (**6a**)

Pd(PhCN)2Cl2 (0.14 g, 0.36 mmol, 1 equiv) in dry THF (10 ml) was added to the suspension of **G2(CO2Me)** (1 g, 0.36 mmol/g, 0.36 mmol) in dry THF (10 ml). The suspension was mixed at 70 0C for 24 h. The resin was washed with THF and DCM and dried under vacuum.

Complexation of **7.** Yield>99%, purity>99 %, loading 0.49 of Pd mmol/g.

Following acidolytic cleavage and removal of TFA:

1H NMR (200 MHz, CDCl3):  7.72 (m, 4H), 7.37 (m, 6H), 6.56 (s, 2H), 4.52 (br s, 4H), 4.33 (t, J = 6.6 Hz, 2H), 3.86 (t, J = 6.5 Hz, 2H), 1.70 (m, 4H), 1.29 (m, 14H).

Typical procedure for Heck reaction catalysis

Halobenzene (0.5 mmol), methyl acrylate (54 l, 0.6 mmol) triethyl amine (90 l, 0.65 mmol) and the complexed resin (0.0125 mmol, of Pd) in 1 ml NMP in a pressure tube were sealed under nitrogen and heated with stirring. After cooling, the resin was filtered off and washed with acetonitrile. The combined organic solution was prepared for HPLC analysis.

1. L. S. Hegedus *in Organometallics in synthesis*, ed. M Schlosser, Wiley, 1994. [↑](#footnote-ref-2)
